# Supplementary material for: Effects of tropical deforestation on climate and agriculture
Source: Springer Nature journal article supplement (doi:10.1038/nclimate2430), 2014-12-17
Supplement: 41558_2015_BFnclimate2430_MOESM472_ESM.pdf [file 41558_2015_BFnclimate2430_MOESM472_ESM.pdf]

## Effects of tropical deforestation on climate and agriculture

Additional references cited in the text.

101 Chagnon, F.J. & Bras, R.L. 2005. Contemporary climate change in the Amazon. *Geophys. Res. Lett.* **32**:L13703.

102 Chen, T., Yoon, J., St Croix, K., & Takle, E. 2001. Suppressing impacts of the Amazonian deforestation by the global circulation change. *B. Am. Meteorol. Soc.* **82**:2209-2216.

103 Marengo, J.A. 2004. Interdecadal variability and trends of rainfall across the Amazon basin. *Theor. Appl. Climatol.* **78**:79-96.

104 Gloor, M. et al. 2013. Intensification of the Amazon hydrological cycle over the last two decades. *Geophys. Res. Lett.* **40**:1-5.

105 Li, W., Fu, R., Negron-Juarez, R. I., & Fernandes, K. 2008. Observed change of the standardized precipitation index, its potential cause and implications to future climate change in the Amazon region. *Philos. Trans. R. Soc.* **363**:1767–1772.

106 Marengo, J.A., Nobre, C.A., Sampaio, G., Salazar, L.F., & Borma, L.S. 2011. Climate change in the Amazon Basin: Tipping points, changes in extremes, and impacts on natural and human systems. Pages 259-283 in Bush, M., Flenley, J., & Gosling, W., Eds. *Tropical rainforest responses to climatic change*. Springer, Berlin.

107 Espinoza Villar, J.C. et al. 2009. Spatio-temporal rainfall variability in the Amazon basin countries (Brazil, Peru, Bolivia, Colombia, and Ecuador). *Int. J. Climatol.* **29**: 1574–1594.

108 Kanae S., Oki, T., & Musiak, K. 2001. Impact of deforestation on regional precipitation over the Indochina Peninsula. *J. Hydrometeorol.* **2**:51-70.

109 Kumagai, T., Kanamori, H. & Yasunari, T. 2013. Deforestation-induced reduction in rainfall. *Hydrol. Process.* **27**: 3811–3814.

110 Yin, X. & Gruber, A. 2010. Validation of the abrupt change in GPCP precipitation in the Congo River Basin. *Int. J. Climatol.* **30**:110–119.

111 Hulme, M., Doherty, R., Ngara, T., New, M., & Lister, D. 2001. African climate change: 1900–2100. *Clim Res.* **17**:145–168

- 112 Costa, M.H., Yanagi, S.N.M., Souza, P.J.O.P., Ribeiro, A., & Rocha, E.J.P. 2007. Climate change in Amazonia caused by soybean cropland expansion, as compared to caused by pastureland expansion. *Geophys. Res. Lett.* **34**:L07706.
- 113 Gordon, L. et al. 2005. Human modification of global water vapor flows from the land surface. *P. Natl. Acad. Sci. USA.* **102**(21): 7612-7617.
- 114 Oliveira, L.J.C., Costa, M.H., Soares-Filho, B.S., & Coe, M.T. 2013. Large-scale expansion of agriculture in Amazonia may be a no-win scenario. *Environ. Res. Lett.* **8**(2).
- 115 Marengo, J.A., Nobre, C.A., & Culf, A.D. 1997: Climatic impacts of “friagens” in forested and deforested areas of the Amazon basin. *J. Appl. Meteor.* **36**:1553–1566.
- 116 Garreaud, R. 2000. Cold air incursions over Subtropical South America: Mean structure and dynamics. *Mon. Weather Rev.* **128**:2544–2559.
- 117 Durieux, L., Machado, L., & Laurent, H. 2003. The impact of deforestation on cloud cover over the Amazon arc of deforestation. *Remote Sens. Environ.* **86**:132–140.
- 118 Fisch, G. et al. 2004. The convective boundary layer over pasture and forest in Amazonia. *Theor. Appl. Climatol.* **78**(1-3):47-59.
- 119 Machado, L.A.T., Laurent, H., Dessay, N., & Miranda, I. 2004. Seasonal and diurnal variability of convection over the Amazonia: a comparison of different vegetation types and large scale forcing. *Theor. Appl. Climatol.* **78**:61–77.
- 120 Bradshaw, C.J.A., Sodhi, N.S., Peh, K.S.H., & Brook, B.W. 2007. Global evidence that deforestation amplifies flood risk and severity in the developing world. *Glob. Change Biol.* **13**(11): 2379–2395.
